# Supplementary material for: Cell-Type-Specific Profiling of Gene Expression and Chromatin Binding without Cell Isolation: Assaying RNA Pol II Occupancy in Neural Stem Cells
Source: PubMed Central journal article supplement — Dev Cell. 2013 Jul 15;26(1):101–12. doi: 10.1016/j.devcel.2013.05.020 (PMC3714590; doi:10.1016/j.devcel.2013.05.020), 2013-07-15
Supplement: mmc1.pdf [file mmc1.pdf]

Developmental Cell, Volume 26

## **Supplemental Information**

### **Cell-Type-Specific Profiling of Gene Expression**

#### **and Chromatin Binding without Cell Isolation:**

#### **Assaying RNA Pol II Occupancy in Neural Stem Cells**

**Tony D. Southall, Katrina S. Gold, Boris Egger, Catherine M. Davidson, Elizabeth E. Caygill, Owen J. Marshall, and Andrea H. Brand**

### **Inventory of Supplemental Material**

#### **Supplemental Figures**

**Figure S1** Dam-Pol II protein is undetectable relative to endogenous Pol II (related to Figure 1)

**Figure S2** Pol II occupancy at genes involved in the retinal determination network (related to Figure 5)

**Figure S3** Cell type-specific differences in RNA Pol II occupancy reflect differences in gene expression (related to Figures 6 and 7)

#### **Supplemental Tables**

**Table S1** Comparison of Dam-Pol II occupancy with published expression data (related to Figure 4)

**Table S2** Genes with significant Pol II occupancy (separate excel file) (related to Figures 4, 5, 6 and 7)

#### **Supplemental Experimental Procedures**

#### **Supplemental References**

Supplemental Figures

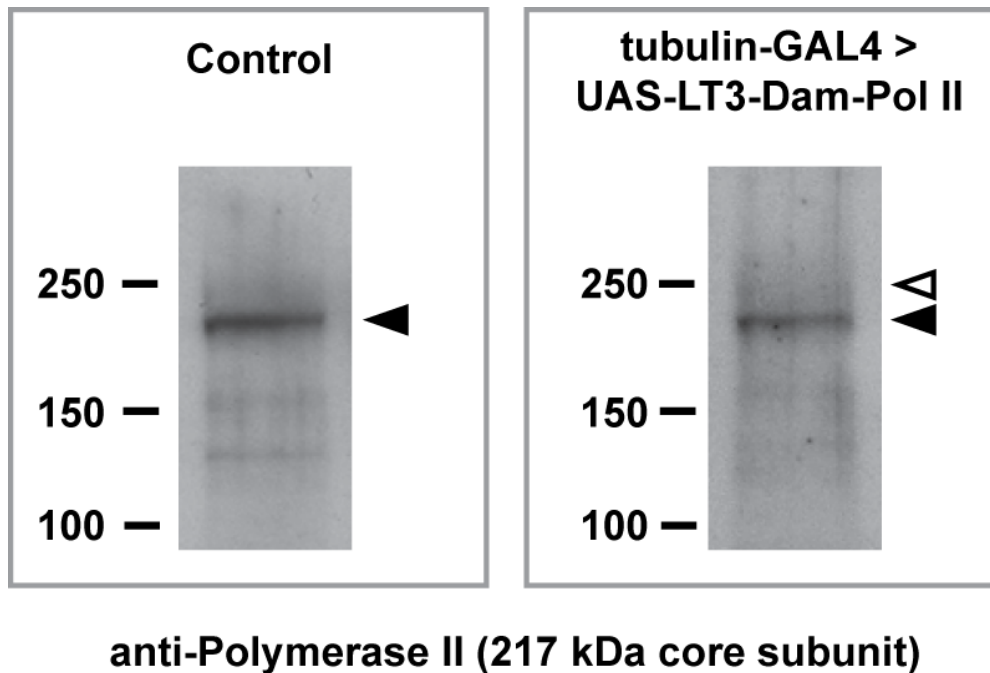

**Figure S1, related to Figure 1.** Dam-Pol II protein is undetectable relative to endogenous Pol II. Western blot showing endogenous Pol II levels (217 kDa, black arrowheads) in wildtype third instar larvae and third instar larvae expressing Dam-Pol II in all cells. Intensity levels were normalised to total protein loaded. No Dam-Pol II protein is detectable in the tubulin-GAL4>UAS-LT3-Dam-Pol II lane (predicted size 245 kDa; empty arrowhead). We compared the intensity of the band at 217 kDa with the region of the gel at predicted size 245 kDa for both samples, following background subtraction. The ratio of intensity is very similar: control = 2.4, larvae expressing Dam-Pol II = 2.3.

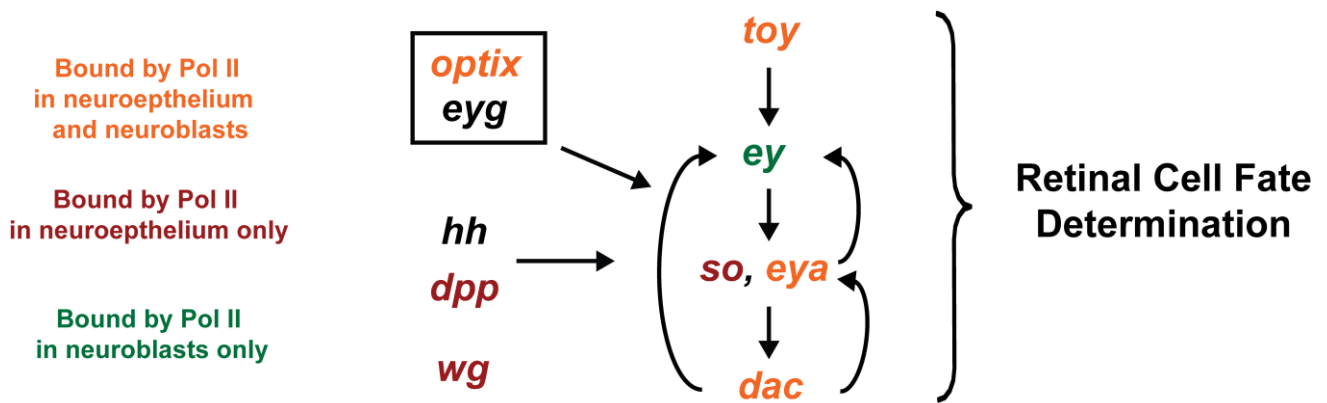

**Figure S2, related to Figure 5.** Pol II occupancy at genes involved in the retinal determination network. The majority of the retinal determination network (adapted from (Chen and Mardon, 2005) genes are bound by Pol II in the neuroepithelium, in neuroblasts or in both.

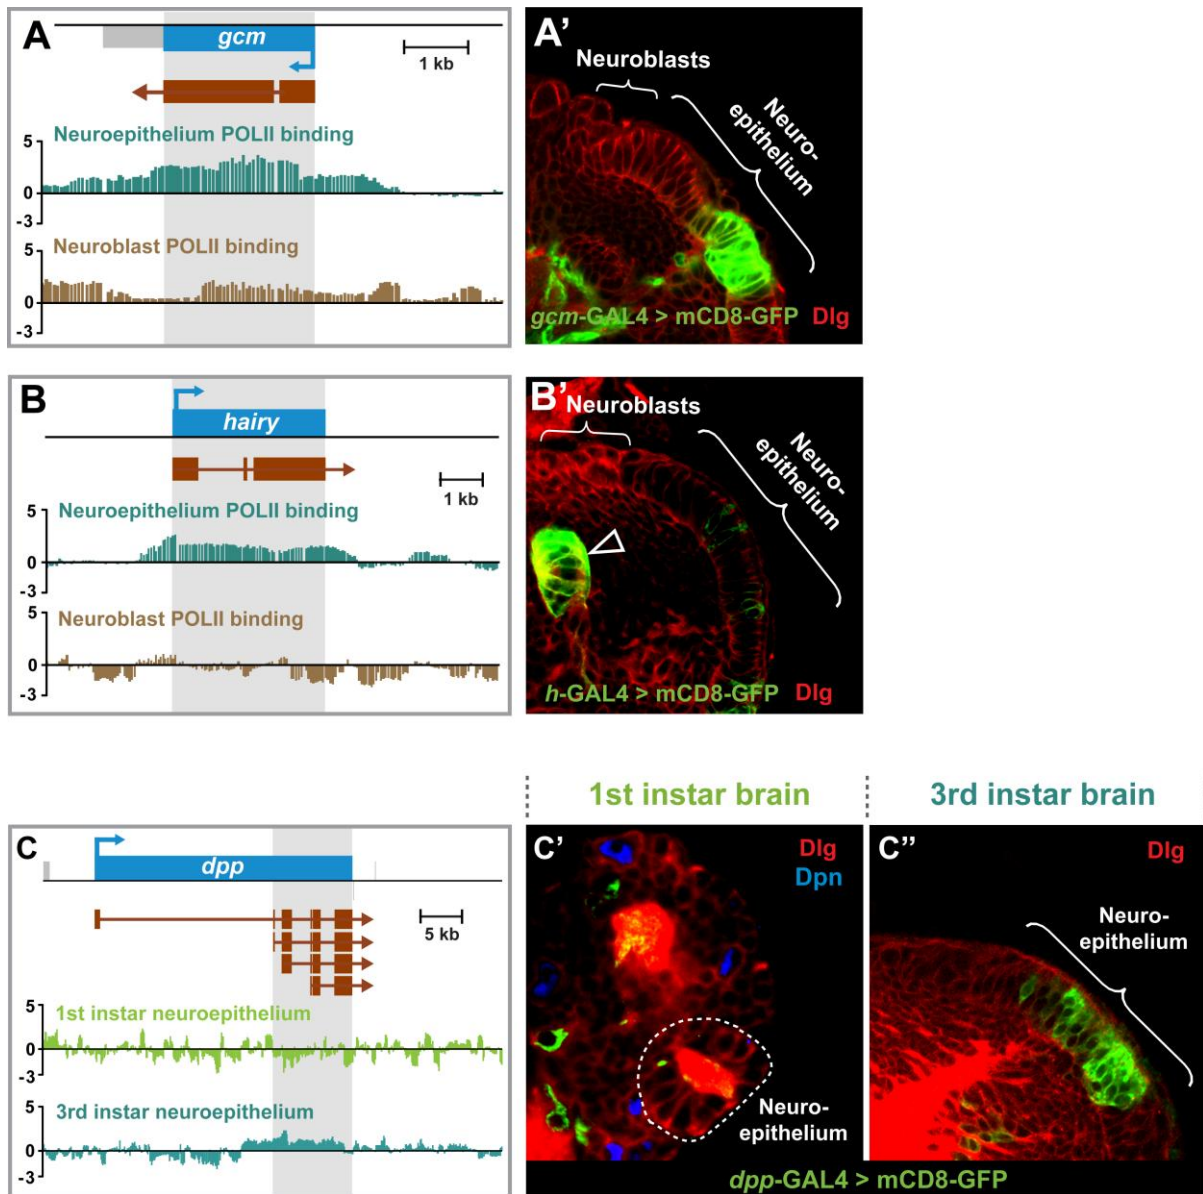

**Figure S3, related to Figures 6 and 7.** Cell type-specific and temporal differences in RNA Pol II occupancy reflect differences in gene expression. (A) and (B) Differential Pol II occupancy in the neuroepithelium and neuroblasts. (A') and (B') Expression pattern of the respective genes in the larval brain. (B') *hairy* is expressed in the neuroepithelium of the inner proliferation centre (IPC; open arrowhead). (C) Differential Pol II occupancy between the early and late larval neuroepithelium. (C') Expression of *dpp* in the first instar larval brain. (C'') Expression of *dpp* in the third instar larval brain. Scale bars represent log<sub>2</sub> ratio change between Dam-Pol II and Dam (reference) samples.

## Supplemental Tables

| Gene            | Significant Pol II occupancy | Reference                   |
|-----------------|------------------------------|-----------------------------|
| <i>Tom</i>      | yes                          | (Egger et al., 2010)        |
| <i>Cad99C</i>   | yes                          | (Fung et al., 2008)         |
| <i>fat</i>      | yes                          | (Reddy et al., 2010)        |
| <i>sca</i>      | yes                          | (Mlodzik et al., 1990)      |
| <i>sc</i>       | yes                          | (Egger et al., 2007)        |
| <i>l(3)mbt</i>  | yes                          | (Richter et al., 2011)      |
| <i>tlf</i>      | yes                          | (Yasugi et al., 2008)       |
| <i>HLHm5</i>    | yes                          | (Egger et al., 2010)        |
| <i>upd</i>      | yes                          | (Yasugi et al., 2008)       |
| <i>pnt</i>      | yes                          | (Yasugi et al., 2010)       |
| <i>rho</i>      | yes                          | (Yasugi et al., 2010)       |
| <i>HLHmy</i>    | yes                          | (Yasugi et al., 2010)       |
| <i>N</i>        | yes                          | (Egger et al., 2010)        |
| <i>yan/aop</i>  | yes                          | (Yasugi et al., 2010)       |
| <i>Vsx1</i>     | yes                          | (Erclik et al., 2008)       |
| <i>ex</i>       | yes                          | (Reddy et al., 2010)        |
| <i>ds</i>       | yes                          | (Reddy et al., 2010)        |
| <i>fj</i>       | yes                          | (Reddy et al., 2010)        |
| <i>Dll</i>      | yes                          | (Kaphingst and Kunes, 1994) |
| <i>wg</i>       | yes                          | (Kaphingst and Kunes, 1994) |
| <i>dpp</i>      | yes                          | (Kaphingst and Kunes, 1994) |
| <i>arm</i>      | yes                          | (Hayden et al., 2007)       |
| <i>DI</i>       | yes                          | (Egger et al., 2010)        |
| <i>shg</i>      | yes                          | (Orihara-Ono et al., 2011)  |
| <i>Mcm2</i>     | yes                          | (Orihara-Ono et al., 2011)  |
| <i>neur</i>     | yes                          | (Boulianne et al., 1991)    |
| <i>CycA</i>     | yes                          | (Zhu et al., 2008)          |
| <i>mnb</i>      | yes                          | (Tejedor et al., 1995)      |
| <i>l'sc</i>     | yes                          | (Yasugi et al., 2008)       |
| <i>th/Diap1</i> | yes                          | (Richter et al., 2011)      |
| <i>dpp</i>      | yes                          | (Kaphingst and Kunes, 1994) |
| <i>bi/omb</i>   | yes                          | (Li and Padgett, 2012)      |
| <i>ft</i>       | yes                          | (Kawamori et al.)           |
| <i>Vdup1</i>    | yes                          | (Chang et al., 2010)        |
| <i>hth</i>      | yes                          | (Hasegawa et al., 2011)     |
| <i>lft</i>      | yes                          | (Mao et al., 2009)          |
| <i>yki</i>      | yes                          | (Reddy et al., 2010)        |
| <i>patj</i>     | no                           | (Egger et al., 2007)        |
| <i>mer</i>      | no                           | (Reddy et al., 2010)        |
| <i>aPKC</i>     | no                           | (Orihara-Ono et al., 2011)  |
| <i>dome</i>     | no                           | (Wang et al., 2010)         |
| <i>STAT92E</i>  | no                           | (Wang et al., 2010)         |

**Table S1, related to Figure 4.** Comparison of Dam-Pol II occupancy with published expression data. Literature search for genes reported to be expressed in the optic lobe neuroepithelium (determined by antibody staining, RNA in situ hybridisation or enhancer trap expression).

**Table S2, related to Figures 4, 5, 6 and 7.** Genes with significant Pol II occupancy in 3<sup>rd</sup> instar neuroepithelial cells, 3<sup>rd</sup> instar neuroblasts and 1<sup>st</sup> instar neuroepithelial cells (separate excel file).

## **Supplemental Experimental Procedures**

| <b>Primer name</b> | <b>Sequence (5' to 3')</b>                                 |
|--------------------|------------------------------------------------------------|
| LT1-Ndam FW        | GGAATTCATGGGAGGATCAGCTGGATAATAAGGCATGAAGAAAAATCGCGCTTTTTTG |
| LT1-Ndam RV        | GGGAGATCTCGCAGATCCTCTTCAGAGATGAGTTTC                       |
| mGFP6 FW           | GGAATTCATGAGTAAAGGAGAAGAACTTTTC                            |
| $\Delta$ mGFP6 RV  | CAAAAAAGCGCGATTTTTCTTCATCTTATTACCGCTTCATATGATCAGGGTAAC     |
| LT2-Ndam FW        | GTTACCCTGATCATATGAAGCGGTAATAAGATGAAGAAAAATCGCGCTTTTTTG     |
| Ndam RV            | GGGAGATCTGCGCCGGCCAGATCCTC                                 |
| mCherry FW         | GGAATTCATGGCAACTAGCGGCATGGTTAG                             |
| mCherry RV         | CAAAAAAGCGCGATTTTTCTTCATGTTATTATGCGGTACCAGAACCTTTG         |
| LT3-Ndam FW        | CAAAGGTTCTGGTACCGCATAATAACATGAAGAAAAATCGCGCTTTTTTG         |
| mGFP6 RV           | CAGATCTCCTTTGTATAGTTCATCCATGCCATG                          |
| RpII215 FW         | GTACGCGGCCGCTCATGAGCACCCACGGACTCGAAG                       |
| RpII215 RV         | GTCTAGATCAGTCTTCGCTCTCCTCGAACGTGG                          |

**Primer sequences for generating constructs.** LT1-Ndam FW and LT1-Ndam RV were used to generate pUAST-LT1-NDam. mGFP6 FW,  $\Delta$ mGFP6 RV, LT2-Ndam FW and Ndam RV were used to generate pUAST-LT2-NDam. mCherry FW, mCherry RV, LT3-NDam FW and Ndam RV were used to generate pUASTattB-LT3-NDam. mGFP FW and mGFP RV were used to generate pUAST-NGFP. RpII215 FW and RpII215 RV were used to amplify RpII215 for cloning into pUAST-NGFP and pUASTattB-LT3-NDam.

## **Supplemental References**

Boulianne, G.L., de la Concha, A., Campos-Ortega, J.A., Jan, L.Y., and Jan, Y.N. (1991). The *Drosophila* neurogenic gene neuralized encodes a novel protein and is expressed in precursors of larval and adult neurons. *EMBO J* 10, 2975-2983.

Chang, S., Mandalaywala, N.V., Snyder, R.G., Levendusky, M.C., and Dearborn, R.E., Jr. (2010). Hedgehog-dependent down-regulation of the tumor suppressor, vitamin D3 up-regulated protein 1 (VDUP1), precedes lamina development in *Drosophila*. *Brain Res* 1324, 1-13.

Chen, R., and Mardon, G. (2005). Keeping an eye on the fly genome. *Dev Biol* 282, 285-293.

Egger, B., Boone, J.Q., Stevens, N.R., Brand, A.H., and Doe, C.Q. (2007). Regulation of spindle orientation and neural stem cell fate in the *Drosophila* optic lobe. *Neural Dev* 2, 1.

- Egger, B., Gold, K.S., and Brand, A.H. (2010). Notch regulates the switch from symmetric to asymmetric neural stem cell division in the *Drosophila* optic lobe. *Development* 137, 2981-2987.
- Erclik, T., Hartenstein, V., Lipshitz, H.D., and McInnes, R.R. (2008). Conserved role of the *Vsx* genes supports a monophyletic origin for bilaterian visual systems. *Curr Biol* 18, 1278-1287.
- Fung, S., Wang, F., Chase, M., Godt, D., and Hartenstein, V. (2008). Expression profile of the cadherin family in the developing *Drosophila* brain. *J Comp Neurol* 506, 469-488.
- Hasegawa, E., Kitada, Y., Kaido, M., Takayama, R., Awasaki, T., Tabata, T., and Sato, M. (2011). Concentric zones, cell migration and neuronal circuits in the *Drosophila* visual center. *Development* 138, 983-993.
- Hayden, M.A., Akong, K., and Peifer, M. (2007). Novel roles for APC family members and Wingless/Wnt signaling during *Drosophila* brain development. *Dev Biol* 305, 358-376.
- Kaphingst, K., and Kunes, S. (1994). Pattern formation in the visual centers of the *Drosophila* brain: wingless acts via decapentaplegic to specify the dorsoventral axis. *Cell* 78, 437-448.
- Kawamori, H., Tai, M., Sato, M., Yasugi, T., and Tabata, T. (2011). Fat/Hippo pathway regulates the progress of neural differentiation signaling in the *Drosophila* optic lobe. *Dev Growth Differ* 53, 653-667.
- Li, Y., and Padgett, R.W. (2012). *bantam* is required for optic lobe development and glial cell proliferation. *PLoS One* 7, e32910.
- Mao, Y., Kucuk, B., and Irvine, K.D. (2009). *Drosophila* *lowfat*, a novel modulator of Fat signaling. *Development* 136, 3223-3233.
- Mlodzik, M., Baker, N.E., and Rubin, G.M. (1990). Isolation and expression of *scabrous*, a gene regulating neurogenesis in *Drosophila*. *Genes Dev* 4, 1848-1861.
- Orihara-Ono, M., Toriya, M., Nakao, K., and Okano, H. (2011). Downregulation of Notch mediates the seamless transition of individual *Drosophila* neuroepithelial progenitors into optic medullar neuroblasts during prolonged G1. *Dev Biol* 351, 163-175.
- Reddy, B.V., Rauskolb, C., and Irvine, K.D. (2010). Influence of fat-hippo and notch signaling on the proliferation and differentiation of *Drosophila* optic neuroepithelia. *Development* 137, 2397-2408.
- Richter, C., Oktaba, K., Steinmann, J., Muller, J., and Knoblich, J.A. (2011). The tumour suppressor *L(3)mbt* inhibits neuroepithelial proliferation and acts on insulator elements. *Nat Cell Biol* 13, 1029-1039.
- Tejedor, F., Zhu, X.R., Kaltenbach, E., Ackermann, A., Baumann, A., Canal, I., Heisenberg, M., Fischbach, K.F., and Pongs, O. (1995). *minibrain*: a new protein kinase family involved in postembryonic neurogenesis in *Drosophila*. *Neuron* 14, 287-301.
- Wang, W., Li, Y., Zhou, L., Yue, H., and Luo, H. (2010). Role of JAK/STAT signaling in neuroepithelial stem cell maintenance and proliferation in the *Drosophila* optic lobe. *Biochem Biophys Res Commun* 410, 714-720.

Yasugi, T., Sugie, A., Umetsu, D., and Tabata, T. (2010). Coordinated sequential action of EGFR and Notch signaling pathways regulates proneural wave progression in the *Drosophila* optic lobe. *Development* 137, 3193-3203.

Yasugi, T., Umetsu, D., Murakami, S., Sato, M., and Tabata, T. (2008). *Drosophila* optic lobe neuroblasts triggered by a wave of proneural gene expression that is negatively regulated by JAK/STAT. *Development* 135, 1471-1480.

Zhu, C.C., Boone, J.Q., Jensen, P.A., Hanna, S., Podemski, L., Locke, J., Doe, C.Q., and O'Connor, M.B. (2008). *Drosophila* Activin- and the Activin-like product Dawdle function redundantly to regulate proliferation in the larval brain. *Development* 135, 513-521.
